# Supplementary material
Source: PubMed Central journal article supplement (PMC4166560)
Supplement: NIHMS624220-supplement-3.pdf [file NIHMS624220-supplement-3.pdf]

# Supplementary Figure S1

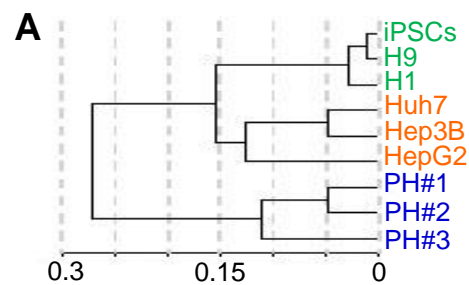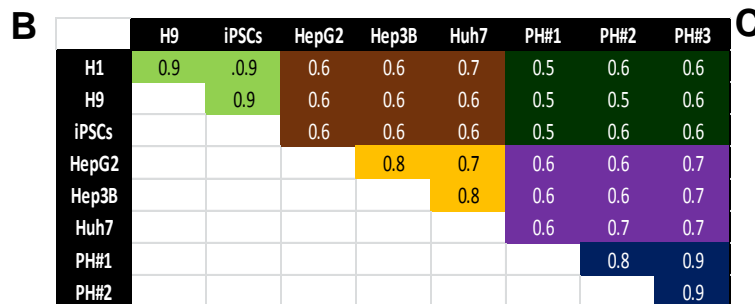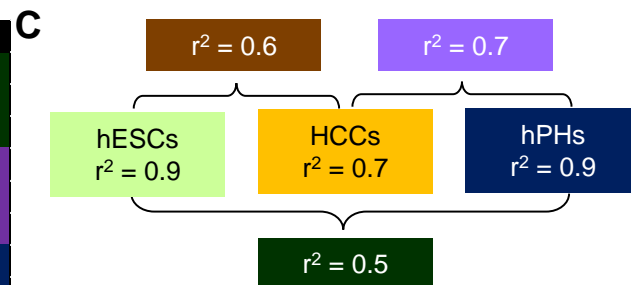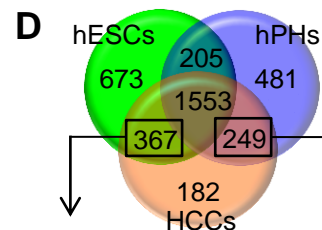

| Cluster | Enrichment Score | GO Term                                                  | P-Value | Fold Enrichment | FDR    |
|---------|------------------|----------------------------------------------------------|---------|-----------------|--------|
| 1       | 7.943            | GO:0000279~M phase                                       | 0.000   | 4.013           | 0.000  |
| 2       | 4.849            | GO:0016070~RNA metabolic process                         | 0.000   | 2.544           | 0.000  |
| 3       | 4.802            | GO:0051276~chromosome organization                       | 0.000   | 3.141           | 0.000  |
| 4       | 4.671            | GO:0006260~DNA replication                               | 0.000   | 4.543           | 0.002  |
| 5       | 3.402            | GO:0006259~DNA metabolic process                         | 0.000   | 2.910           | 0.001  |
| 6       | 3.381            | GO:0006807~nitrogen compound metabolic process           | 0.000   | 1.693           | 0.000  |
| 7       | 3.296            | GO:0050657~nucleic acid transport                        | 0.000   | 6.282           | 0.005  |
| 8       | 3.170            | GO:0006270~DNA replication initiation                    | 0.038   | 9.521           | 48.197 |
| 9       | 2.595            | GO:0010605~macromolecule metabolic process               | 0.000   | 2.283           | 0.032  |
| 10      | 1.963            | GO:0051726~regulation of cell cycle                      | 0.000   | 2.915           | 0.162  |
| 11      | 1.950            | GO:0051188~cofactor biosynthetic process                 | 0.003   | 4.188           | 4.869  |
| 12      | 1.930            | GO:0007059~chromosome segregation                        | 0.001   | 5.015           | 1.744  |
| 13      | 1.729            | GO:0009116~nucleoside metabolic process                  | 0.008   | 4.760           | 13.112 |
| 14      | 1.525            | GO:0034621~macromolecular complex subunit organization   | 0.011   | 2.133           | 17.014 |
| 15      | 1.521            | GO:0009127~nucleoside monophosphate biosynthetic process | 0.005   | 11.284          | 7.921  |
| 16      | 1.401            | GO:0034660~ncRNA metabolic process                       | 0.002   | 2.870           | 3.286  |
| 17      | 1.389            | GO:0006268~DNA unwinding during replication              | 0.030   | 10.881          | 39.919 |
| 18      | 1.317            | GO:0051329~interphase of mitotic cell cycle              | 0.016   | 3.451           | 23.550 |
| 19      | 1.306            | GO:0034470~ncRNA processing                              | 0.012   | 2.715           | 17.770 |
| 20      | 1.249            | GO:0000226~microtubule cytoskeleton organization         | 0.026   | 2.763           | 35.687 |

| Cluster | Enrichment Score | GO Term                                                | P-Value | Fold Enrichment | FDR   |
|---------|------------------|--------------------------------------------------------|---------|-----------------|-------|
| 1       | 7.382            | GO:0009605~response to external stimulus               | 0.000   | 3.105           | 0.000 |
| 2       | 6.562            | GO:0009611~response to wounding                        | 0.000   | 4.119           | 0.000 |
| 3       | 4.026            | GO:0002526~acute inflammatory response                 | 0.000   | 8.167           | 0.002 |
| 4       | 3.394            | GO:0034381~lipoprotein particle clearance              | 0.000   | 36.381          | 0.000 |
| 5       | 3.343            | GO:0042060~wound healing                               | 0.000   | 5.333           | 0.004 |
| 6       | 2.823            | GO:0070482~response to oxygen levels                   | 0.000   | 5.160           | 0.233 |
| 7       | 2.736            | GO:0006519~amino acid and derivative metabolic process | 0.000   | 3.307           | 0.172 |
| 8       | 2.695            | GO:0043691~reverse cholesterol transport               | 0.000   | 36.381          | 0.000 |
| 9       | 2.353            | GO:0008219~cell death                                  | 0.000   | 2.328           | 0.573 |
| 10      | 2.339            | GO:0016044~membrane organization                       | 0.001   | 2.865           | 1.288 |
| 11      | 2.204            | GO:0006810~transport                                   | 0.003   | 1.467           | 4.506 |
| 12      | 2.076            | GO:0051704~multi-organism process                      | 0.006   | 2.030           | 9.242 |
| 13      | 1.947            | GO:0002526~acute inflammatory response                 | 0.000   | 7.870           | 0.001 |
| 14      | 1.927            | GO:0002237~response to molecule of bacterial origin    | 0.001   | 5.923           | 1.930 |
| 15      | 1.728            | GO:0030100~regulation of endocytosis                   | 0.001   | 7.157           | 2.435 |
| 16      | 1.713            | GO:0006082~organic acid metabolic process              | 0.002   | 2.339           | 2.967 |
| 17      | 1.632            | GO:0006518~peptide metabolic process                   | 0.006   | 6.864           | 9.528 |
| 18      | 1.592            | GO:0042445~hormone metabolic process                   | 0.003   | 4.805           | 5.499 |
| 19      | 1.550            | GO:0019216~regulation of lipid metabolic process       | 0.001   | 5.197           | 1.459 |
| 20      | 1.523            | GO:0043933~macromolecular complex subunit organization | 0.002   | 2.152           | 2.909 |

# Supplementary Figure S2

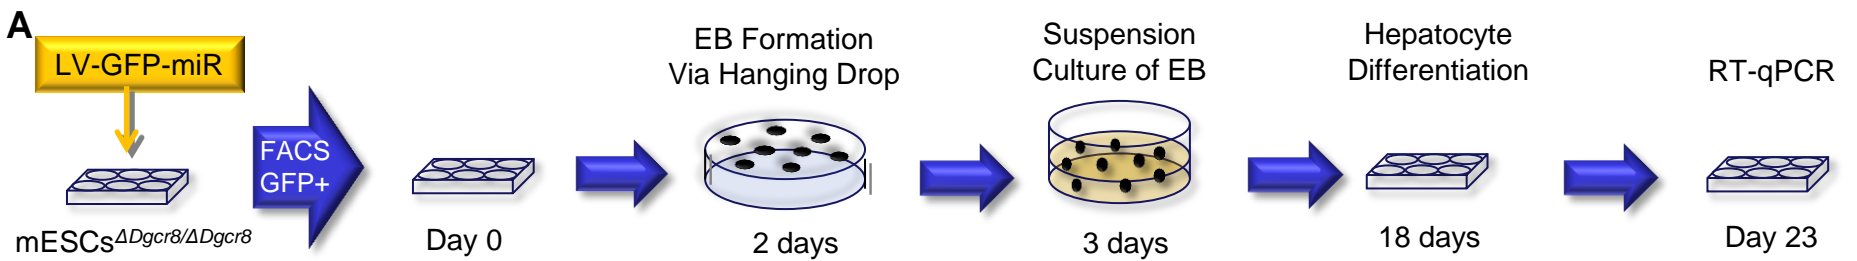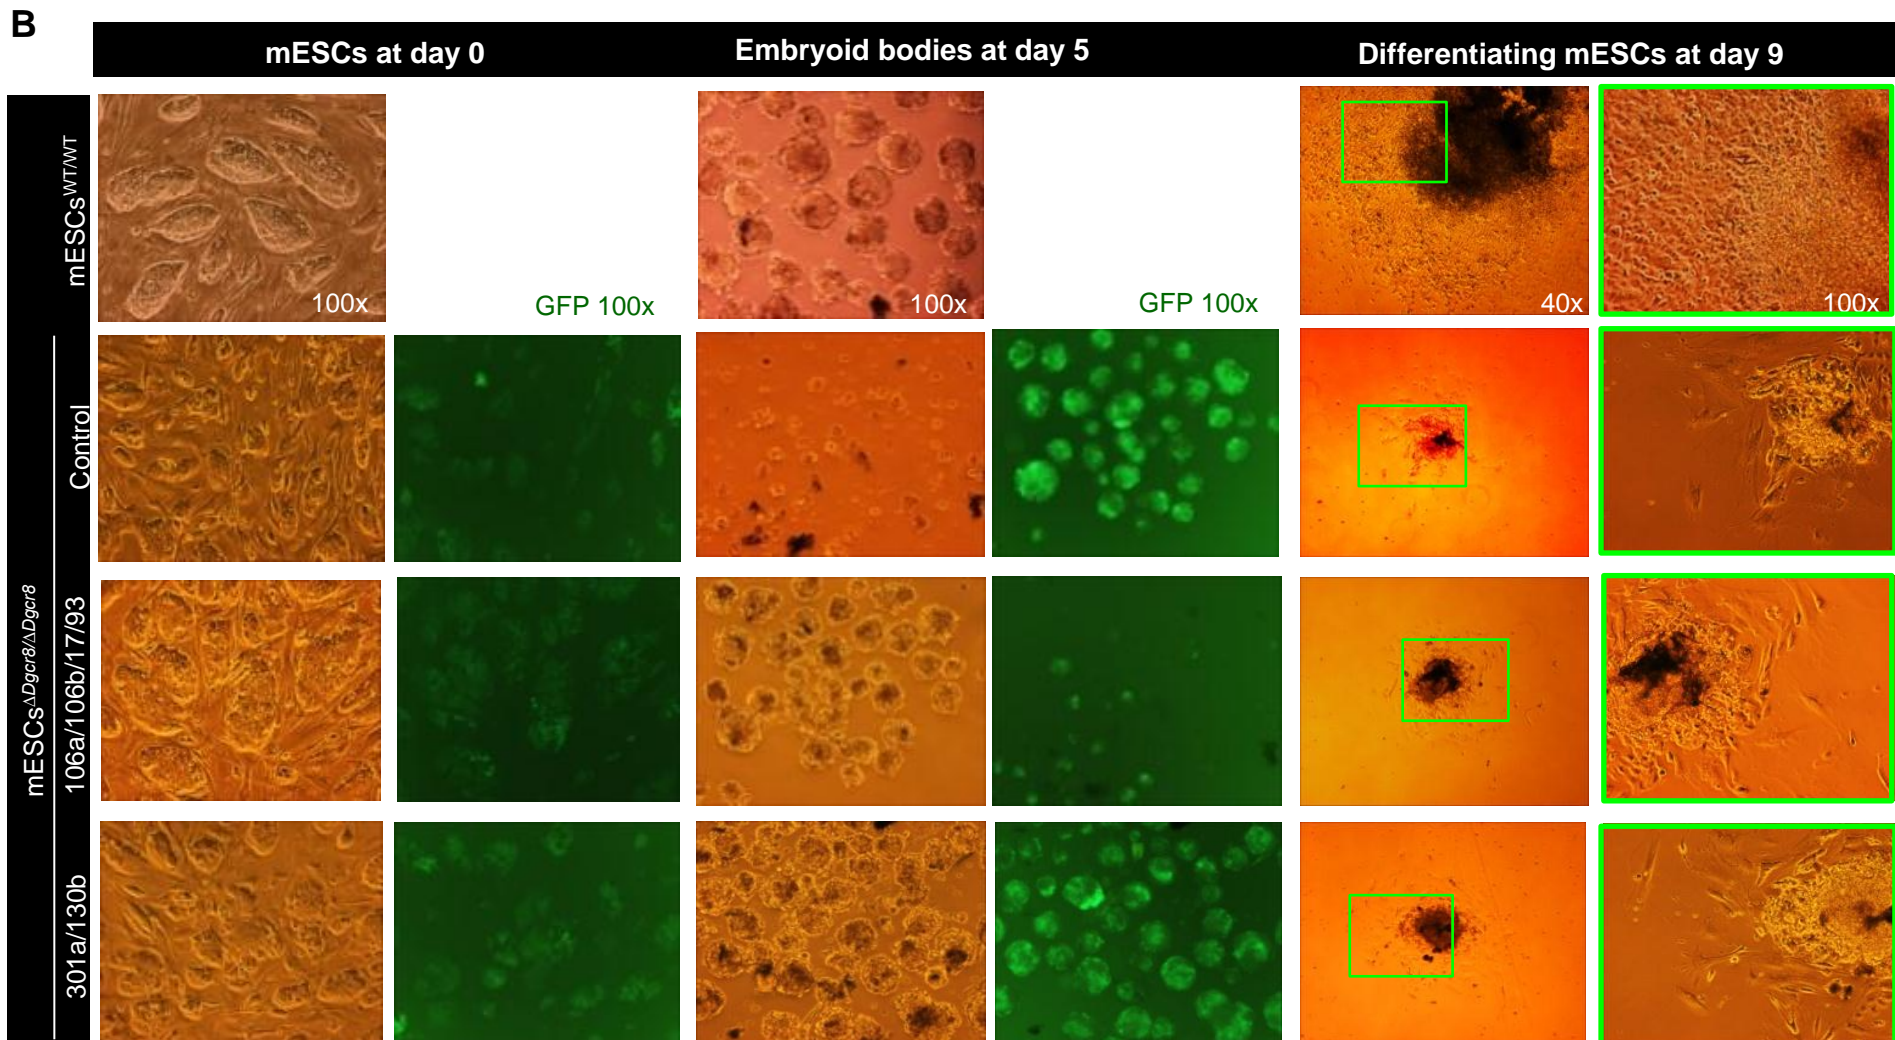

# Supplementary Figure S3

**A**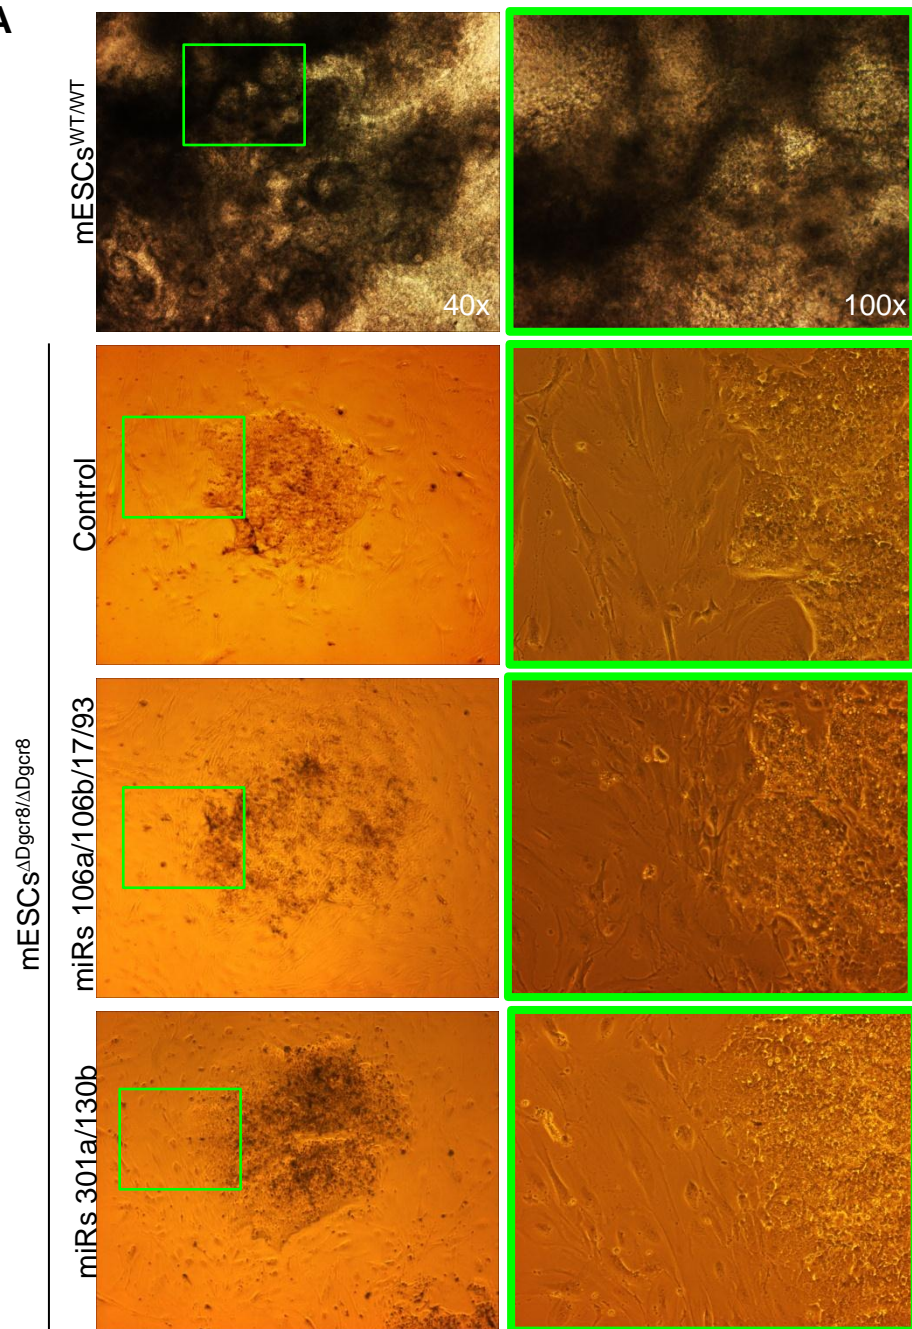**B**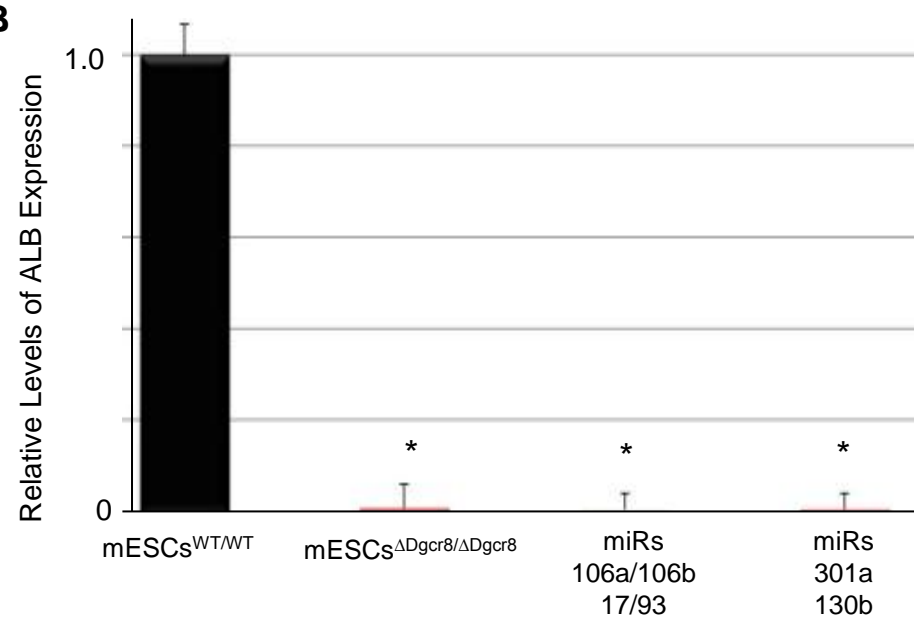

# Supplementary Figure S4

A

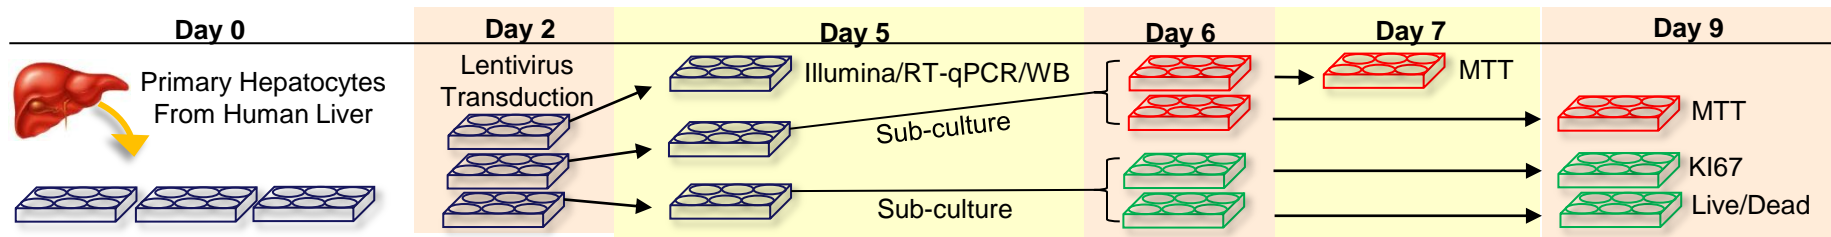

# Supplementary Figure S5

**A**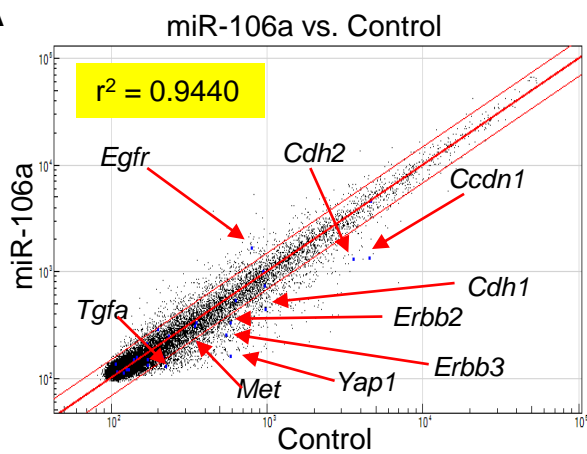**B**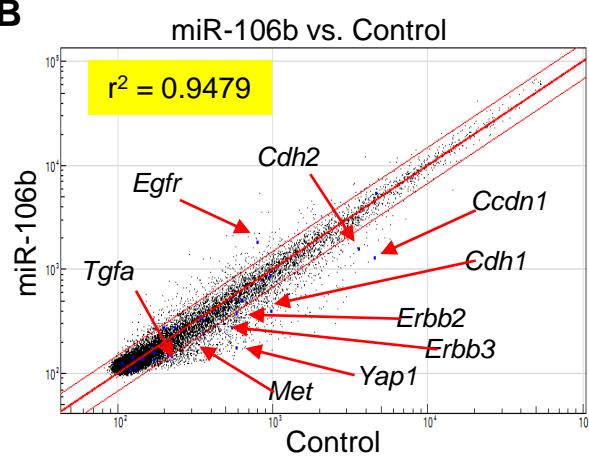**C**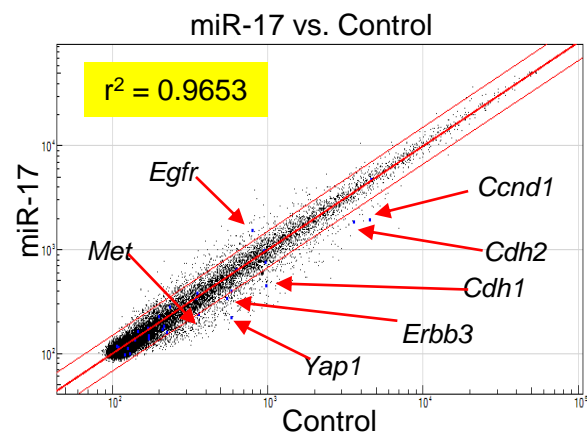**D**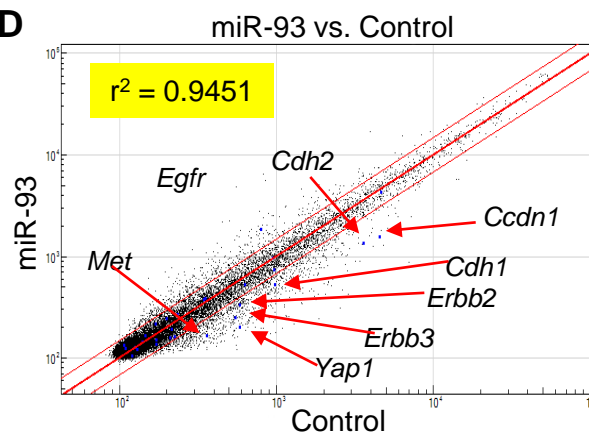**E**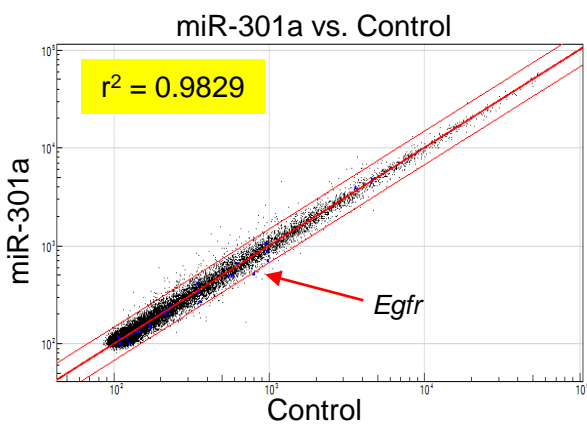**F**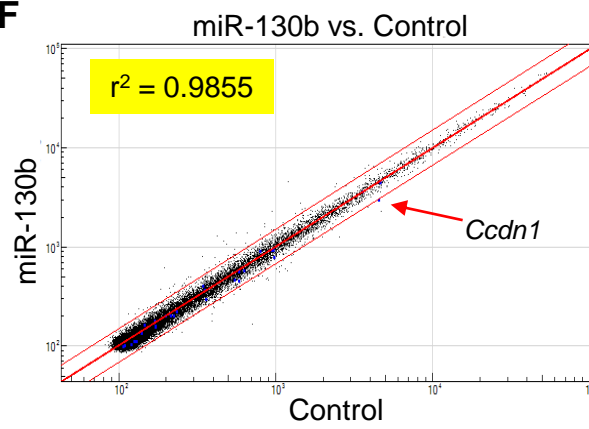**G**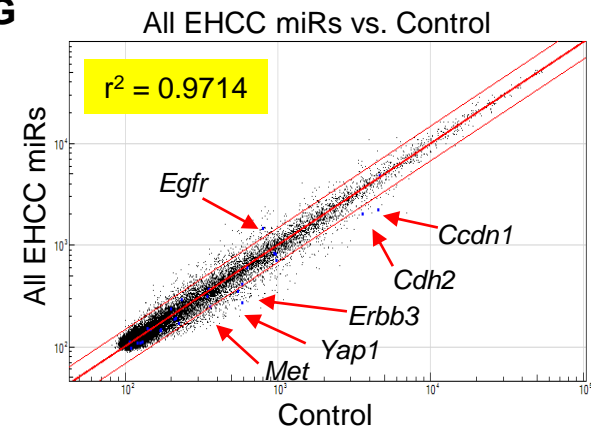

# Supplementary Figure S6

|                                                | miR-106a |             |              | miR-106b |             |              | miR-17  |             |              | miR-93  |             |              | miR-301a |             |              | miR-130b |             |              | All EHCC miRs |             |              |   |
|------------------------------------------------|----------|-------------|--------------|----------|-------------|--------------|---------|-------------|--------------|---------|-------------|--------------|----------|-------------|--------------|----------|-------------|--------------|---------------|-------------|--------------|---|
|                                                | P-Value  | Diff. Score | Fold Δ > 1.5 | P-Value  | Diff. Score | Fold Δ > 1.5 | P-Value | Diff. Score | Fold Δ > 1.5 | P-Value | Diff. Score | Fold Δ > 1.5 | P-Value  | Diff. Score | Fold Δ > 1.5 | P-Value  | Diff. Score | Fold Δ > 1.5 | P-Value       | Diff. Score | Fold Δ > 1.5 |   |
| HCC Associated Genes                           | APC      | 0.340       | 1.153        |          | 0.679       | 0.515        |         | 0.116       | 1.390        |         | 0.071       | 3.340        |          | 0.798       | -0.805       |          | 0.671       | -0.779       |               | 0.963       | -1.667       |   |
|                                                | AXIN1    | 0.001       | -1.690       |          | 0.001       | 0.043        |         | 0.001       | 0.575        |         | 0.001       | 3.856        |          | 0.001       | 6.312        |          | 0.001       | 6.837        |               | 0.001       | -2.031       |   |
|                                                | BRCA2    | 0.012       | 5.435        |          | 0.140       | 3.599        |         | 0.073       | 2.566        |         | 0.010       | 6.451        |          | 0.166       | 2.263        |          | 0.746       | -0.763       |               | 0.388       | 1.167        |   |
|                                                | CCND1    | 0.001       | -80.559      | +        | 0.001       | -80.939      | +       | 0.001       | -53.896      | +       | 0.001       | -73.194      | +        | 0.001       | 0.392        |          | 0.001       | -18.704      |               | 0.001       | -40.078      |   |
|                                                | CDH1     | 0.001       | -31.367      | +        | 0.001       | -36.464      | +       | 0.001       | -32.093      | +       | 0.001       | -23.165      | +        | 0.001       | -9.536       |          | 0.001       | -5.400       | +             | 0.001       | -8.814       | + |
|                                                | CDH2     | 0.001       | -53.729      | +        | 0.001       | -40.863      | +       | 0.001       | -33.552      | +       | 0.001       | -55.542      | +        | 0.001       | 3.277        |          | 0.001       | 0.921        |               | 0.001       | -26.485      | + |
|                                                | CDK4     | 0.001       | -3.013       |          | 0.001       | -4.100       |         | 0.001       | 0.859        |         | 0.001       | -4.286       |          | 0.001       | 1.597        |          | 0.001       | -1.572       |               | 0.001       | -0.430       |   |
|                                                | CIAPIN1  | 0.001       | -7.915       |          | 0.001       | -7.959       |         | 0.001       | -4.437       |         | 0.001       | -6.635       |          | 0.001       | 1.296        |          | 0.001       | 0.602        |               | 0.001       | -1.827       |   |
|                                                | CTTN     | 0.001       | 1.824        |          | 0.001       | -0.240       |         | 0.001       | 3.905        |         | 0.001       | 4.166        |          | 0.001       | -0.890       |          | 0.001       | 3.896        |               | 0.001       | 0.883        |   |
|                                                | CTNNB1   | 0.001       | -0.334       |          | 0.001       | -0.262       |         | 0.001       | 3.038        |         | 0.001       | 3.908        |          | 0.001       | 0.389        |          | 0.001       | 1.940        |               | 0.001       | 1.918        |   |
|                                                | EGFR     | 0.001       | 28.308       | +        | 0.001       | 31.781       | +       | 0.001       | 45.222       | +       | 0.001       | 55.095       | +        | 0.001       | -18.741      | +        | 0.001       | 5.469        |               | 0.001       | 42.202       | + |
|                                                | ERBB2    | 0.001       | -22.093      | +        | 0.001       | -13.341      | +       | 0.001       | -13.734      |         | 0.001       | -24.421      | +        | 0.001       | -2.621       |          | 0.001       | 0.076        |               | 0.001       | -12.212      |   |
|                                                | ERBB3    | 0.001       | -25.840      | +        | 0.001       | -22.728      | +       | 0.001       | -14.740      | +       | 0.001       | -29.395      | +        | 0.001       | -1.505       |          | 0.001       | -2.998       |               | 0.001       | -12.742      | + |
|                                                | ERBB4    | 0.001       | 2.112        |          | 0.005       | 0.355        |         | 0.001       | 0.068        |         | 0.001       | 1.593        |          | 0.003       | -0.696       |          | 0.001       | -0.257       |               | 0.001       | 2.770        |   |
|                                                | FLRT2    | 0.196       | -0.925       |          | 0.463       | -1.720       |         | 0.680       | -5.918       |         | 0.087       | -0.425       |          | 0.017       | 0.244        |          | 0.177       | -2.336       |               | 0.354       | -2.656       |   |
|                                                | HBXIP    | 0.001       | 0.479        |          | 0.001       | 3.795        |         | 0.001       | 1.129        |         | 0.001       | -0.778       |          | 0.001       | 1.542        |          | 0.001       | -0.285       |               | 0.001       | 1.742        |   |
|                                                | HDGF     | 0.001       | -7.342       |          | 0.001       | -1.152       |         | 0.001       | -7.610       |         | 0.001       | -7.791       |          | 0.001       | -1.646       |          | 0.001       | -0.508       |               | 0.001       | -4.529       |   |
|                                                | HGF      | 0.524       | -0.884       |          | 0.813       | -1.425       |         | 0.788       | -4.358       |         | 0.859       | -2.063       |          | 0.146       | -0.043       |          | 0.550       | -2.765       |               | 0.495       | -1.538       |   |
|                                                | MET      | 0.001       | -17.478      | +        | 0.001       | -10.428      | +       | 0.001       | -14.886      | +       | 0.001       | -37.058      | +        | 0.001       | -7.188       |          | 0.001       | -4.555       |               | 0.001       | -12.133      | + |
|                                                | MMP7     | 0.001       | 4.804        |          | 0.001       | 1.158        |         | 0.001       | 1.140        |         | 0.001       | 7.882        |          | 0.001       | -1.161       |          | 0.001       | 1.844        |               | 0.001       | -2.742       |   |
| MYC                                            | 0.001    | 2.057       |              | 0.001    | 0.893       |              | 0.001   | 1.225       |              | 0.001   | 0.863       |              | 0.001    | 4.131       |              | 0.001    | 0.322       |              | 0.001         | -2.345      |              |   |
| NAP1L5                                         | 0.001    | -7.072      |              | 0.001    | -6.888      |              | 0.001   | -2.835      |              | 0.001   | -1.483      |              | 0.001    | -0.645      |              | 0.001    | -0.791      |              | 0.001         | -1.636      |              |   |
| PIM1                                           | 0.001    | 2.151       |              | 0.001    | 5.002       |              | 0.001   | 6.970       |              | 0.001   | 5.573       |              | 0.001    | 1.229       |              | 0.001    | -0.285      |              | 0.001         | 9.889       |              |   |
| PTGS2                                          | 0.015    | -4.890      |              | 0.035    | -4.702      |              | 0.001   | -2.761      |              | 0.001   | -4.584      |              | 0.001    | 1.222       |              | 0.001    | -1.354      |              | 0.001         | -2.806      |              |   |
| RB1                                            | 0.001    | 12.645      |              | 0.001    | 6.518       |              | 0.001   | 3.970       |              | 0.001   | 6.574       |              | 0.001    | 1.012       |              | 0.001    | 0.612       |              | 0.001         | 5.804       |              |   |
| TERT                                           | 0.164    | -0.245      |              | 0.001    | 2.737       |              | 0.176   | -1.982      |              | 0.032   | 0.930       |              | 0.790    | -4.623      |              | 0.205    | -2.170      |              | 0.536         | -2.817      |              |   |
| TGFA                                           | 0.036    | -18.905     | +            | 0.001    | -13.194     | +            | 0.001   | -11.334     |              | 0.001   | -9.333      |              | 0.001    | 0.119       |              | 0.001    | -1.868      |              | 0.001         | -7.280      |              |   |
| TP53                                           | 0.001    | -1.967      |              | 0.001    | -1.055      |              | 0.001   | -4.413      |              | 0.001   | -1.804      |              | 0.001    | -2.795      |              | 0.001    | -1.039      |              | 0.001         | -3.796      |              |   |
| YAP1                                           | 0.001    | -75.685     | +            | 0.001    | -68.028     | +            | 0.001   | -48.582     | +            | 0.001   | -61.779     | +            | 0.001    | 0.601       |              | 0.001    | -6.138      |              | 0.001         | -40.038     | +            |   |
| ESC and/or Hepatic Progenitor Associated Genes | ABCG2    | 0.995       | -3.045       |          | 0.150       | 2.070        |         | 0.502       | -1.081       |         | 0.803       | -0.325       |          | 0.070       | 2.029        |          | 0.932       | -3.653       |               | 0.397       | 0.111        |   |
|                                                | AFP      | 0.001       | -1.332       |          | 0.001       | -0.547       |         | 0.001       | -1.163       |         | 0.001       | 0.121        |          | 0.001       | -2.317       |          | 0.001       | -2.172       |               | 0.001       | 1.218        |   |
|                                                | ALB      | 0.001       | 4.721        |          | 0.001       | 2.568        |         | 0.001       | -0.787       |         | 0.001       | 3.229        |          | 0.001       | -0.183       |          | 0.001       | 1.054        |               | 0.001       | -0.619       |   |
|                                                | CD34     | 0.001       | 4.187        |          | 0.001       | 2.514        |         | 0.001       | 2.118        |         | 0.001       | 2.790        |          | 0.001       | 2.125        |          | 0.001       | 1.113        |               | 0.001       | 0.622        |   |
|                                                | CD44     | 0.001       | -150.803     | +        | 0.001       | -125.990     | +       | 0.001       | -102.627     | +       | 0.001       | -124.661     | +        | 0.001       | 15.382       |          | 0.001       | -1.667       |               | 0.001       | -83.179      | + |
|                                                | KIT      | 0.020       | 3.464        |          | 0.014       | 4.029        |         | 0.080       | 0.584        |         | 0.038       | 2.706        |          | 0.185       | 0.421        |          | 0.253       | -0.597       |               | 0.001       | 6.347        |   |
|                                                | KRT7     | 0.001       | -11.648      |          | 0.001       | -2.952       |         | 0.001       | -8.628       |         | 0.001       | -31.681      | +        | 0.001       | 2.146        |          | 0.001       | 2.108        |               | 0.001       | -29.864      | + |
|                                                | KRT8     | 0.001       | -8.812       |          | 0.001       | -3.040       |         | 0.001       | -5.895       |         | 0.001       | -13.597      |          | 0.001       | -2.452       |          | 0.001       | -0.513       |               | 0.001       | -17.793      |   |
|                                                | KRT14    | 0.688       | -0.319       |          | 0.901       | -0.801       |         | 0.770       | -2.480       |         | 0.708       | -0.012       |          | 0.248       | 0.519        |          | 0.854       | -2.869       |               | 0.810       | -1.527       |   |
|                                                | KRT18    | 0.001       | 2.860        |          | 0.001       | 2.022        |         | 0.001       | 1.741        |         | 0.001       | 0.174        |          | 0.001       | -0.568       |          | 0.001       | -1.735       |               | 0.001       | 0.596        |   |
|                                                | KRT19    | 0.001       | -32.144      |          | 0.001       | -13.425      |         | 0.001       | -19.040      |         | 0.001       | -37.138      |          | 0.001       | 6.623        |          | 0.001       | 3.224        |               | 0.001       | -28.068      |   |
|                                                | NANOG    | 0.731       | 1.705        |          | 0.506       | 3.209        |         | 0.301       | 2.336        |         | 0.211       | 5.609        |          | 0.491       | 2.083        |          | 0.586       | 1.101        |               | 0.676       | 1.651        |   |
|                                                | NOTCH1   | 0.014       | -9.995       |          | 0.001       | -3.211       |         | 0.001       | -7.797       |         | 0.001       | -6.567       |          | 0.001       | -2.137       |          | 0.001       | -1.749       |               | 0.001       | -2.202       |   |
|                                                | PCGF4    | 0.001       | -20.768      |          | 0.001       | -11.670      |         | 0.001       | -7.377       |         | 0.001       | -26.773      |          | 0.001       | 4.084        |          | 0.001       | 0.588        |               | 0.001       | -2.201       |   |
|                                                | POU5F1   | 0.502       | -0.005       |          | 0.420       | 0.557        |         | 0.915       | -3.971       |         | 0.390       | 0.544        |          | 0.377       | -0.372       |          | 0.891       | -3.716       |               | 0.570       | -0.781       |   |
|                                                | PROM1    | 0.104       | -1.166       |          | 0.151       | -1.153       |         | 0.025       | -1.342       |         | 0.001       | 1.991        |          | 0.001       | 3.722        |          | 0.001       | 2.444        |               | 0.019       | -0.157       |   |
|                                                | SMAD4    | 0.001       | -2.131       |          | 0.001       | -2.923       |         | 0.001       | -0.955       |         | 0.001       | -3.902       |          | 0.001       | 2.708        |          | 0.001       | 2.846        |               | 0.001       | -1.572       |   |
|                                                | SOX2     | 0.657       | -1.370       |          | 0.619       | -0.748       |         | 0.487       | -2.536       |         | 0.414       | -0.325       |          | 0.967       | -4.737       |          | 0.242       | -1.214       |               | 0.508       | -1.482       |   |
|                                                | SPTBN1   | 0.001       | -2.426       |          | 0.001       | -0.791       |         | 0.001       | 1.280        |         | 0.001       | -1.185       |          | 0.001       | 0.516        |          | 0.001       | 1.280        |               | 0.001       | -0.755       |   |
|                                                | STAT3    | 0.001       | -34.160      | +        | 0.001       | -22.218      |         | 0.001       | -20.809      |         | 0.001       | -26.955      |          | 0.001       | 5.949        |          | 0.001       | -2.164       |               | 0.001       | -14.665      |   |
| TACSTD1                                        | 0.001    | 3.725       |              | 0.003    | 0.356       |              | 0.001   | -0.015      |              | 0.035   | -1.095      |              | 0.043    | -1.910      |              | 0.001    | -0.216      |              | 0.001         | 1.697       |              |   |
| THY1                                           | 0.954    | -3.437      |              | 0.273    | -0.103      |              | 0.539   | -3.395      |              | 0.971   | -3.909      |              | 0.253    | -1.159      |              | 0.434    | -2.676      |              | 0.653         | -2.674      |              |   |
| WNT3A                                          | 0.164    | 4.817       |              | 0.080    | 6.502       |              | 0.159   | 3.054       |              | 0.971   | 0.776       |              | 0.759    | 1.096       |              | 0.994    | -1.416      |              | 0.405         | 2.880       |              |   |
